# Supplementary material
Source: Springer Nature journal article supplement (https://www.springermedizin.de/resource/supplementary/13063_2014_2366_MOESM2_ESM.pdf/9621984)
Supplement: MOESM2 [file 9621984]

## **Strengths**

- Increasing enthusiasm about conducting clinical trials
- Some university wide initiatives to incentivise researchers
- Reforms to improve research infrastructure
- Improving cross-country collaborations that will improve the broad research capacity

## **Opportunities**

- Economy of the country is growing
- A huge expansion of medical education institutions
- Large and diverse population
- Improving awareness about the need for research and clinical trials

## **Weaknesses**

- Underdeveloped research infrastructure and very few clinical trial units nationwide
- Limited administrative capacity within institutions
- Limited staff capacity to carry out clinical trials, which also puts extreme burden on few staff who can conduct clinical trials but do not have protected research time
- Poor university-industry linkage

## **Threats**

- Global financial crisis leading to low funding opportunity
- Competitive disadvantage in attracting funding
- Brain drain
- Regulatory frameworks and processes are lengthy
